# Supplementary material for: Structure of an RNA G-quadruplex from the West Nile virus genome
Source: PubMed Central journal article supplement (PMC11208454; doi:10.1038/s41467-024-49761-5), 2024-06-26
Supplement: 41467_2024_49761_MOESM3_ESM.pdf [file 41467_2024_49761_MOESM3_ESM.pdf]

## Description of Additional Supplementary Files

**Supplementary Movie 1:** A video of the 8UTG structure rotated 360 degrees.
